# Supplementary figures and images for: Rashba exciton in a 2D perovskite quantum dot
Source: Royal Society of Chemistry journal article supplement (doi:10.1039/d1nr04884h), 2021-01-01

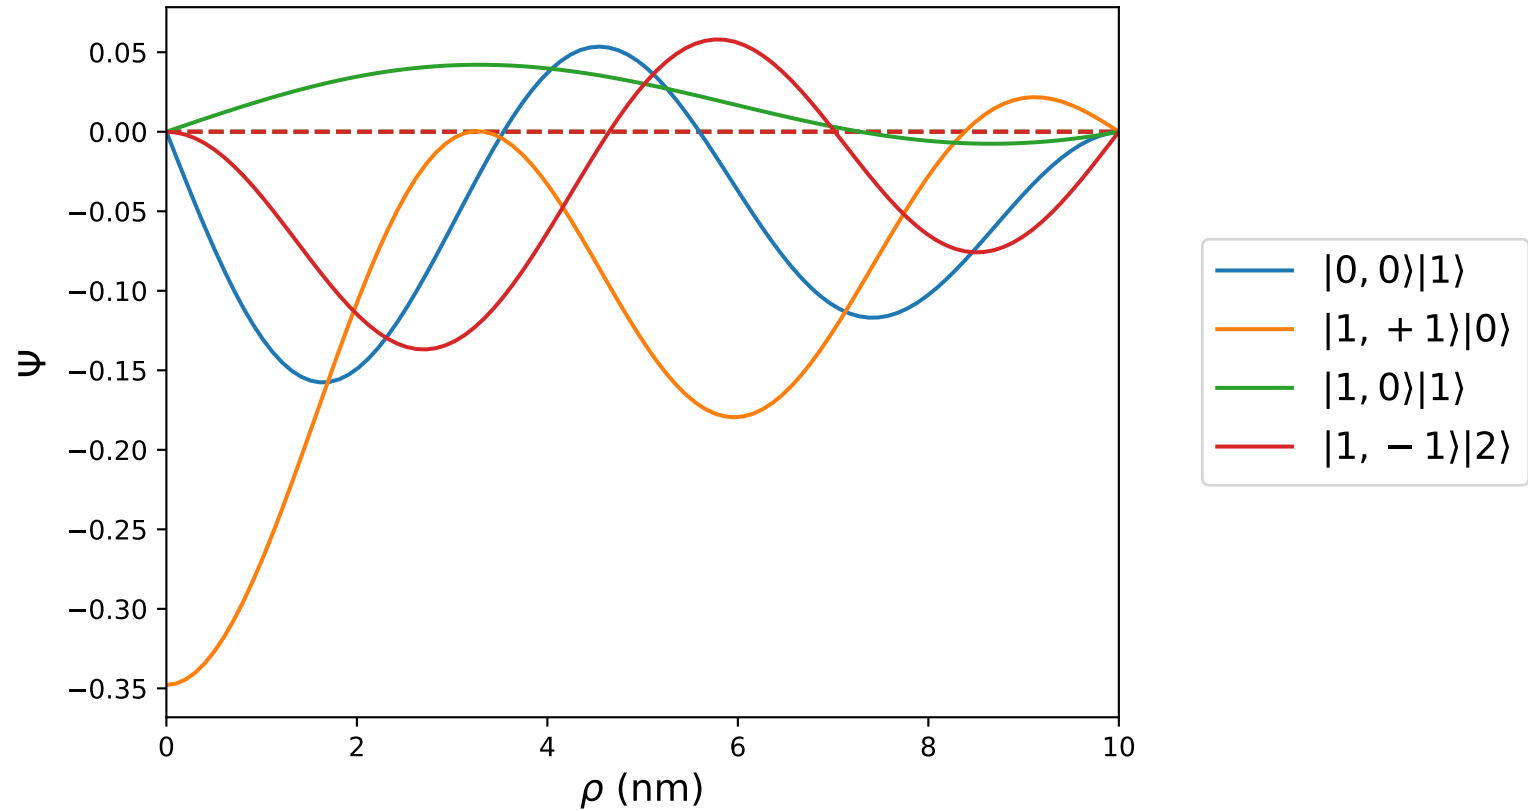

Supplement: d1nr04884h1.zip [file d1nr04884h1.zip]

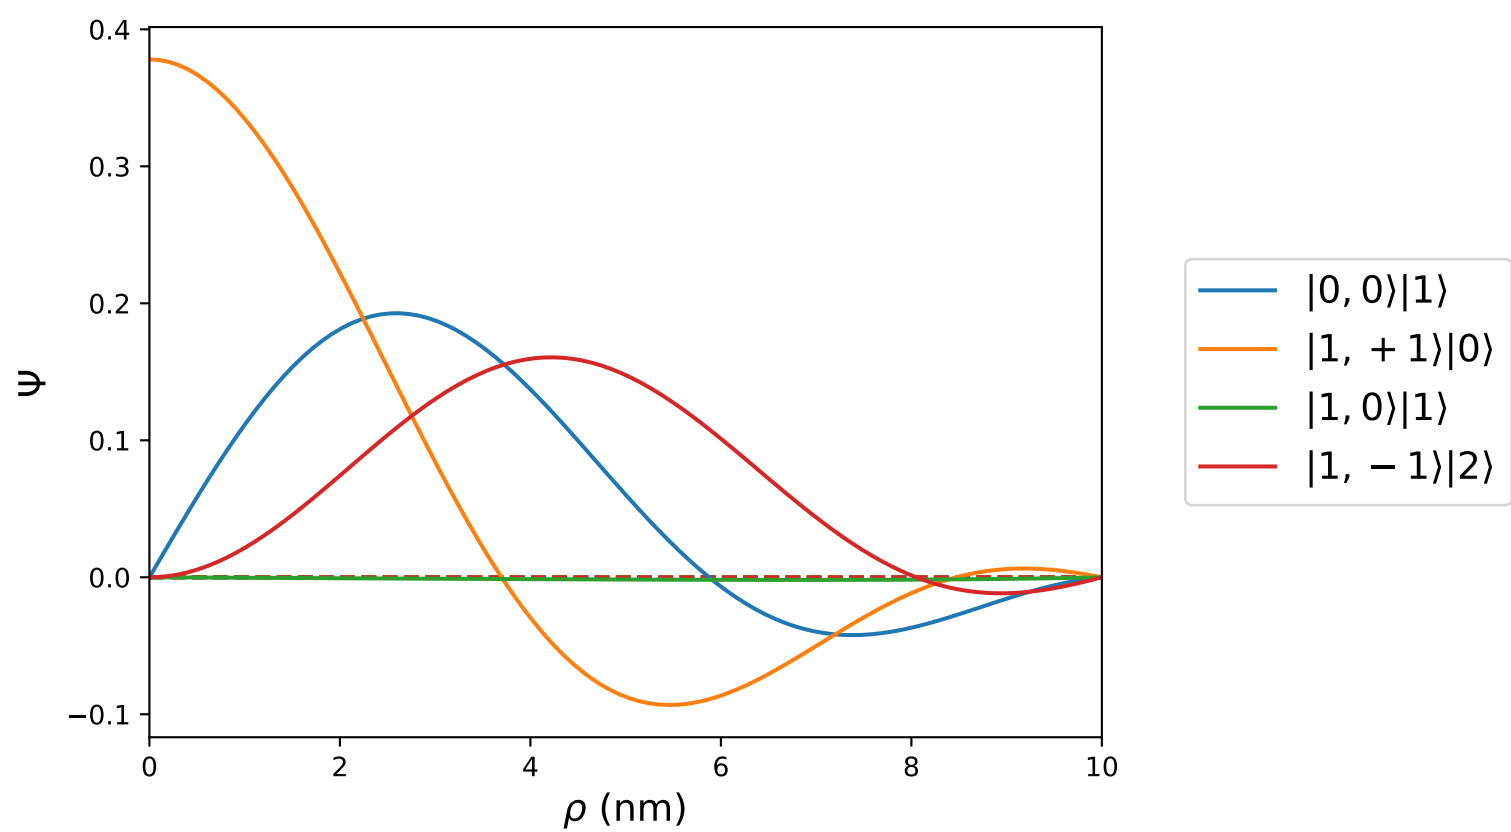

Supplement: d1nr04884h1.zip [file d1nr04884h1.zip]

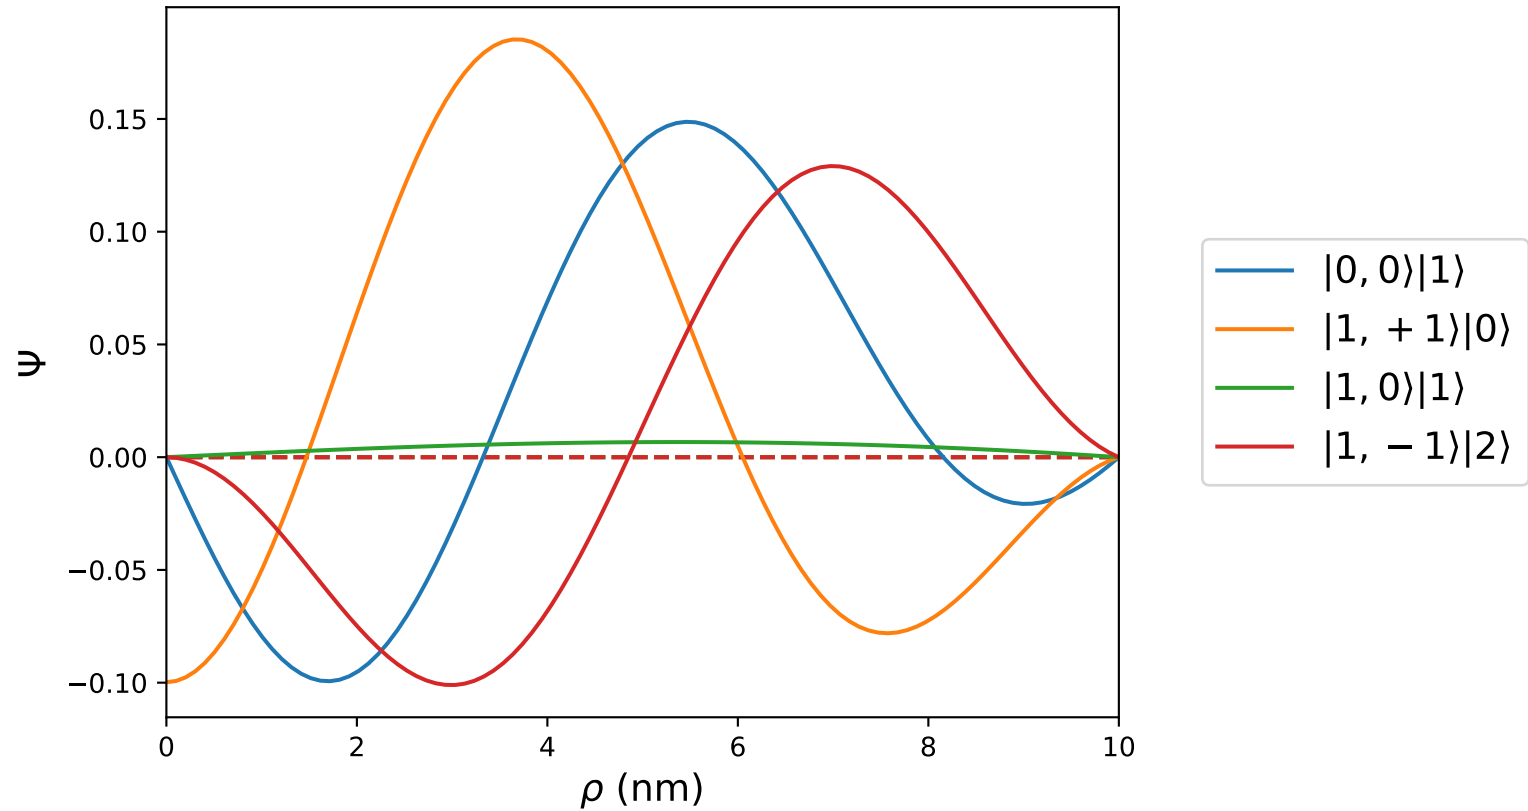

Supplement: d1nr04884h1.zip [file d1nr04884h1.zip]

$$F_z = 1$$

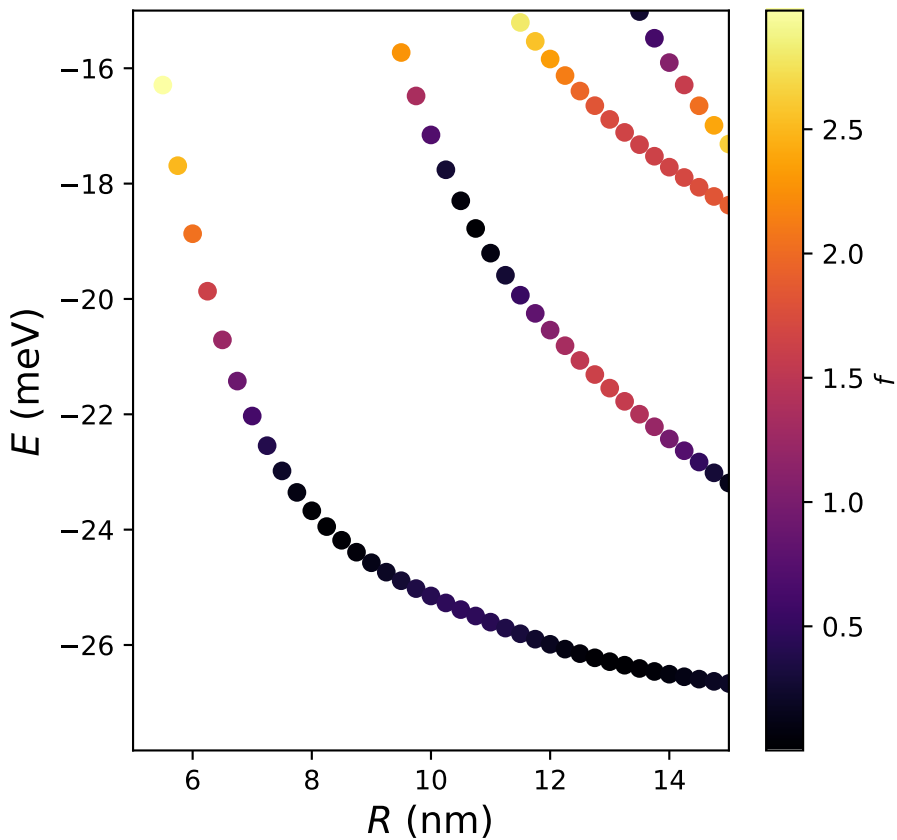

Supplement: d1nr04884h1.zip [file d1nr04884h1.zip]

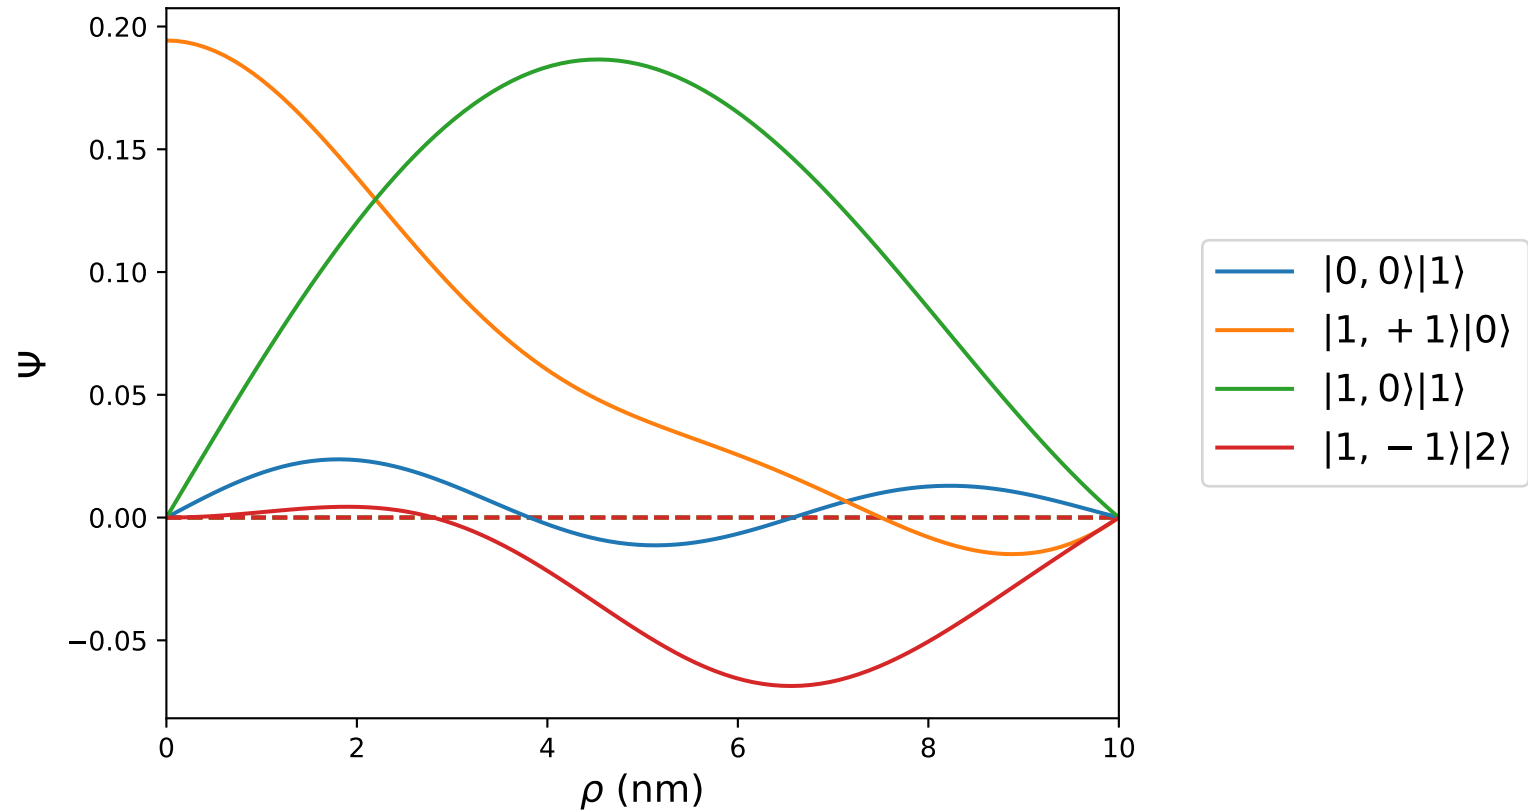

Supplement: d1nr04884h1.zip [file d1nr04884h1.zip]
